# Supplementary material for: Arbutus unedo L. Fractions Exhibit Chemotherapeutic Properties for the Treatment of Gastrointestinal Stromal Tumors
Source: MDPI journal article supplement (doi:10.3390/plants13091201), 2024-04-25
Supplement: s1 [file s1]

## Supplementary information

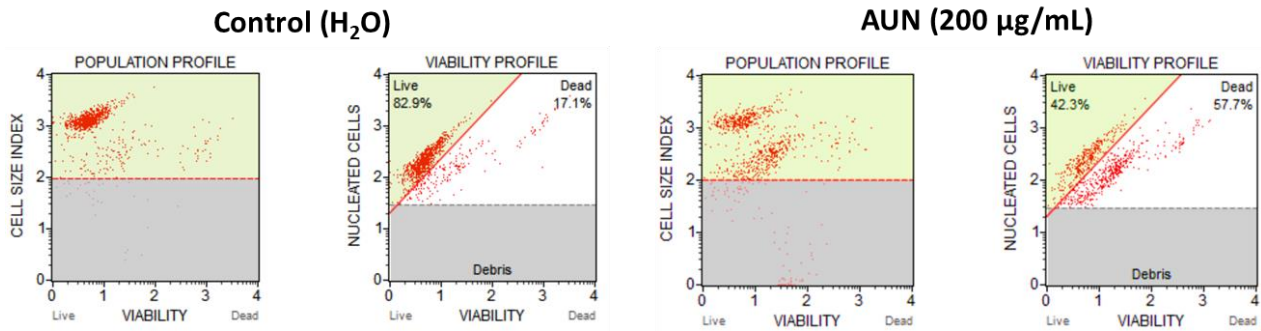

**Supplementary Figure S1. Analysis of viable and dead cells in GIST-882.** Cells were treated with AUN 200 µg/mL and compared to control. Dead cells are labeled using Guava® ViaCount™. Each red point represents a cellular event detected by the flow cytometer. The graph on the left defines the “Population profile” and classifies each event by the “cell size index” (x-axis) and the positivity to the “viability” dye (y-axis). Instead, the “viability profile” on the right defines the event on the positivity to the “nuclear dye” (y-axis) and “viability” (x-axis). A representative replicate of an experiment is shown.

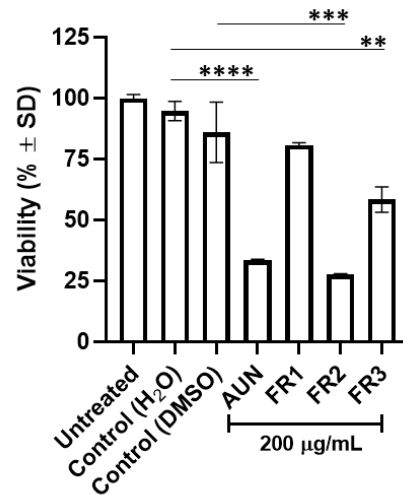

**Supplementary Figure S2. Effect of AUN and its derived FRs in GIST-T1.** Cell viability after AUN or its derived FRs treatment (FR1-FR2-FR3). The length of the treatment was 24h. Viability is expressed in percentage (%) ± SD with respect to the untreated. \*\*\*\* Adjusted P value < 0.0001; \*\*\*<0.001; \*\*<0.01 (One-way ANOVA-Tuckey’s Multiple comparison test with respect to the corresponding solvent negative control). N=2.

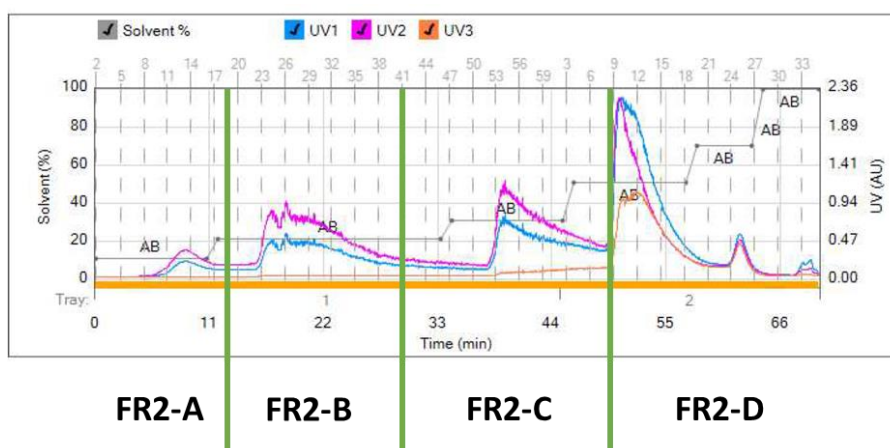

**Supplementary Figure S3. Origin of FR2 subfractions through the 2<sup>nd</sup> step of bio-guided fractionation by reverse phase MPLC.** FR2 was further fractionated using a reverse-phase MPLC as the most active fraction among AUN-derived fractions. Phytochemicals were eluted with different retention times by an increasing gradient of CH<sub>3</sub>OH. The evolution of the UV absorbance at three different wavelengths (UV1=254 nm, UV2=270 nm, and UV3=340 nm) was used to differentiate four main peaks, representative of different families of phytochemicals with different solubility. Thus, FR2 was divided into FR2-A, FR2-B, FR2-C and FR2-D. FR2-A contains more polar compounds than FR2-D, which instead contains more non-polar phytochemicals that are eluted with a high retention time during chromatography.

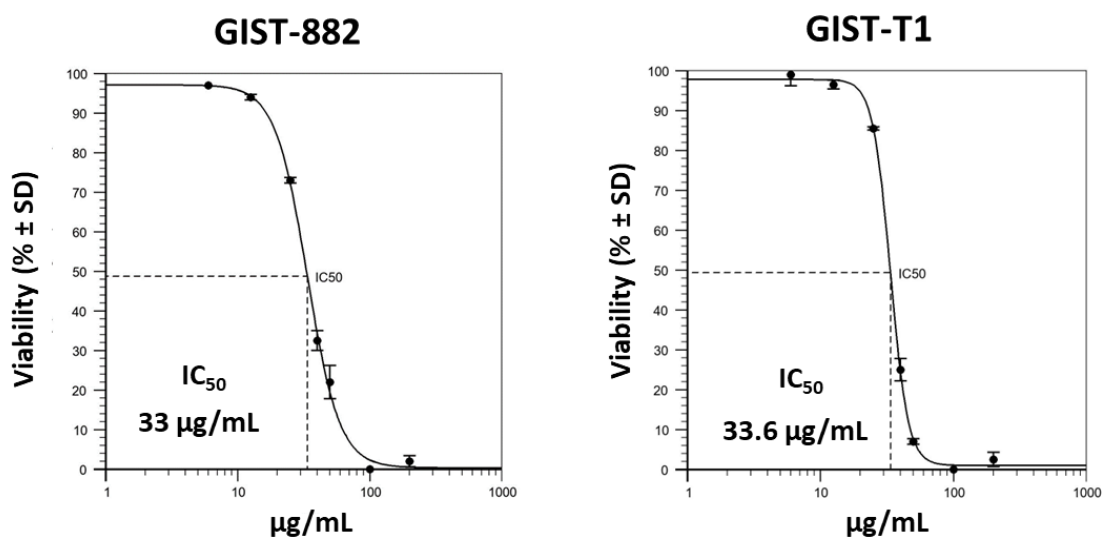

**Supplementary Figure S4. IC<sub>50</sub> Calculation of FR2-A in imatinib-sensitive GIST-882 and GIST-T1.** GIST-882 (left panel) and GIST-T1 (right panel) were treated with FR2-A, and the viability was measured through Guava® ViaCount™ staining and flow cytometry. Cell viability is expressed in % ± SD with respect to control. Calculated IC<sub>50</sub> is reported at the bottom right of both graphs.

(A)

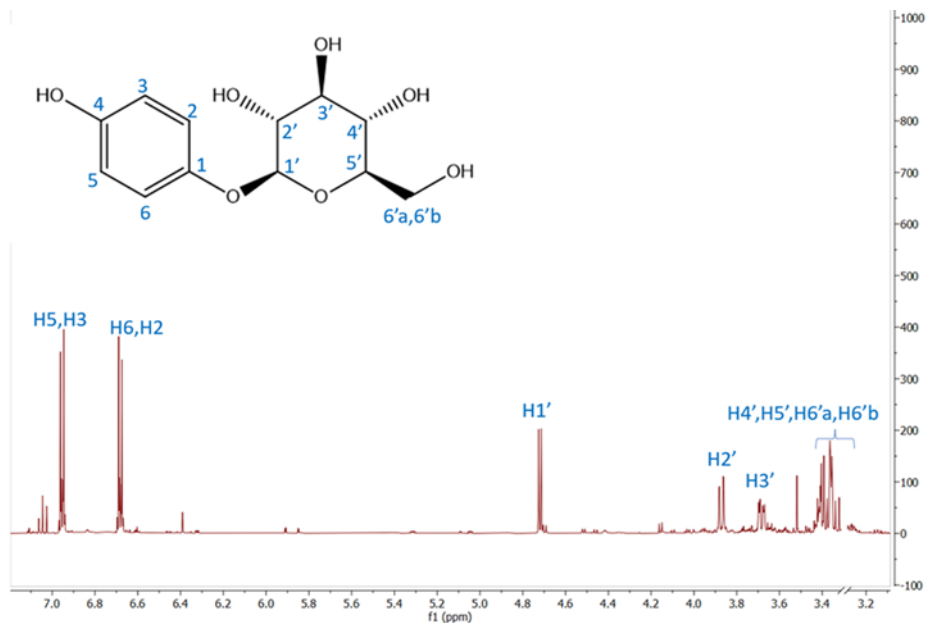

(B)

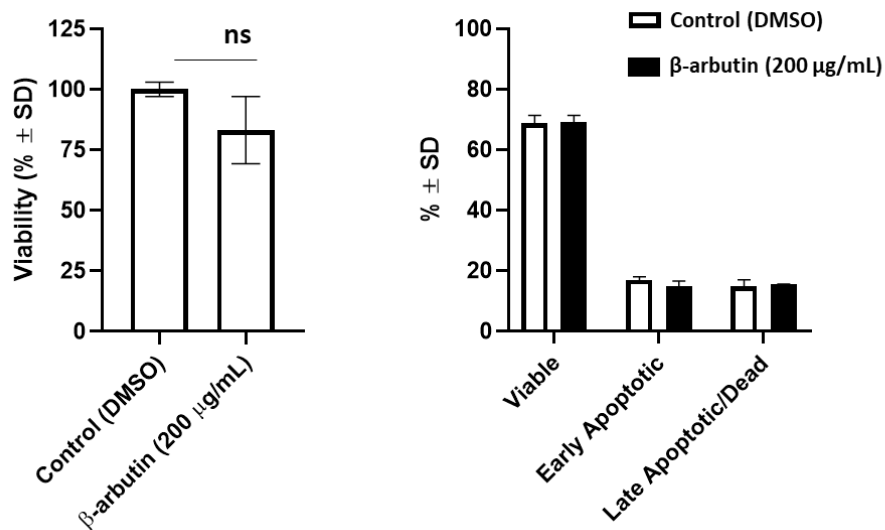

**Supplementary Figure S5.  $\beta$ -arbutin is not the active NP of FR2-A.** (A)  $^1\text{H}$  NMR spectrum in  $\text{MeOH-}d_4$  of FR2-A containing as main compound  $\beta$ -arbutin. Protons responsible for each spectral signal have been assigned. (B) Cell viability after  $\beta$ -arbutin treatment is shown in the left panel. The length of the treatment was 72h. Viability is expressed in %  $\pm$  Standard deviation (SD) with respect to control; ns means "not significant" (unpaired t-test). The % ( $\pm$ SD) of living (Annexin-V (-)/7-AAD (-)), early apoptotic (Annexin V (+)/7-AAD (-)), and late apoptotic/dead (Annexin V (+) and 7-AAD (+)) cell populations are displayed in the right panel. N=2.

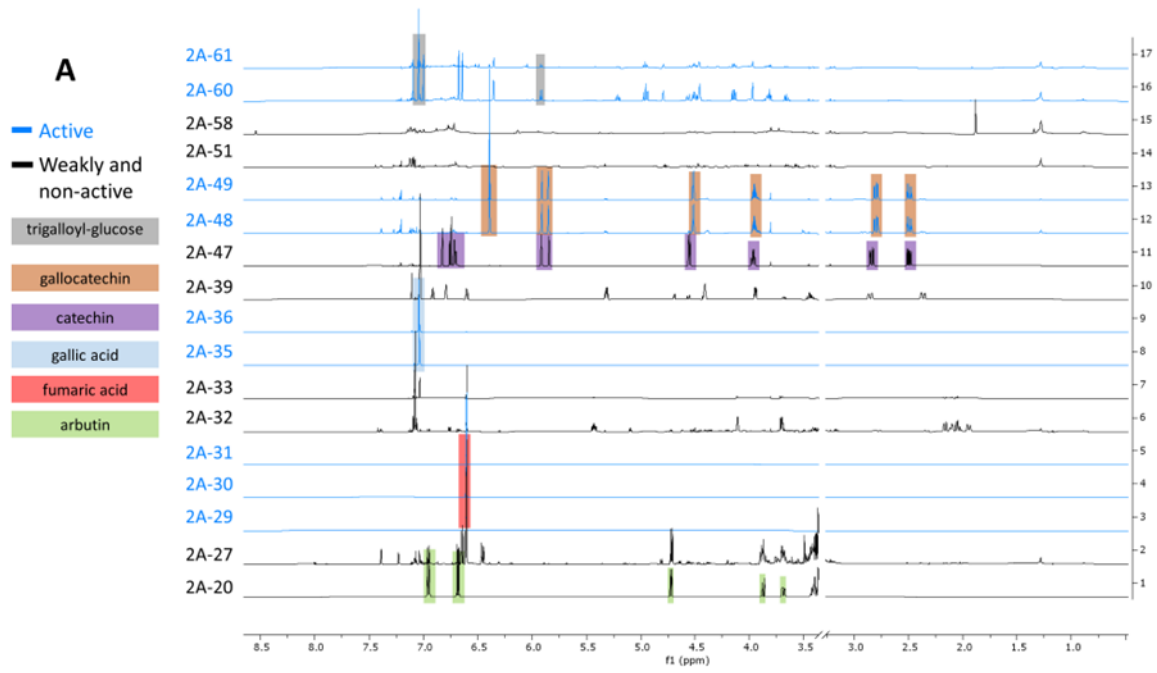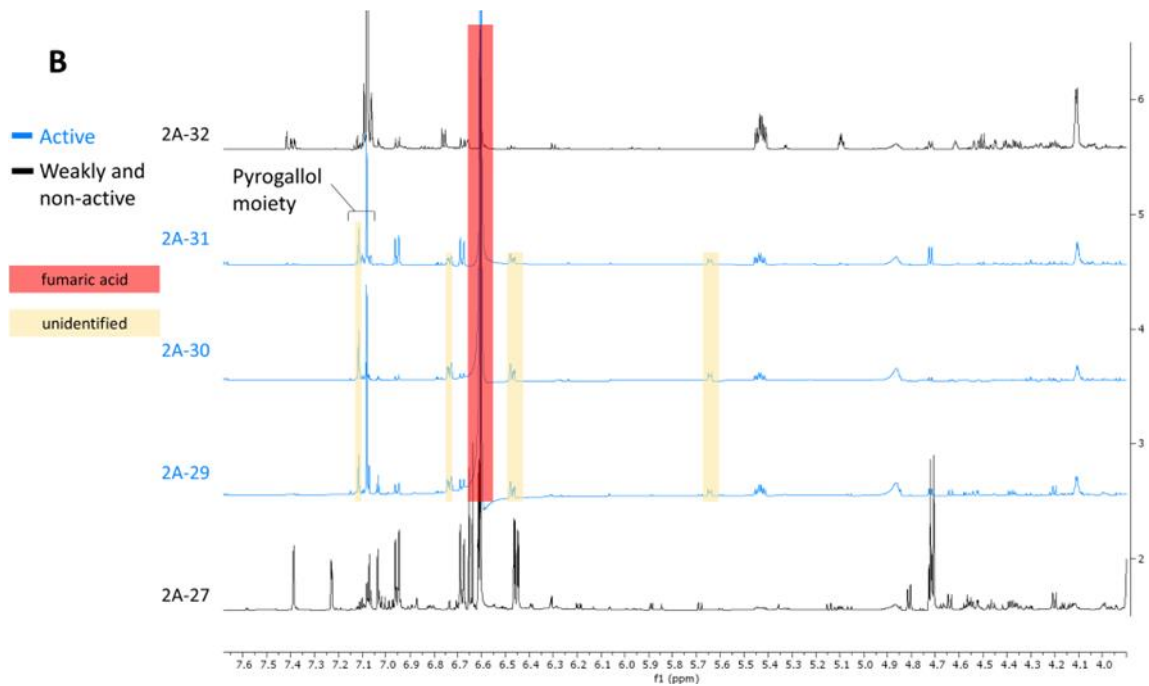

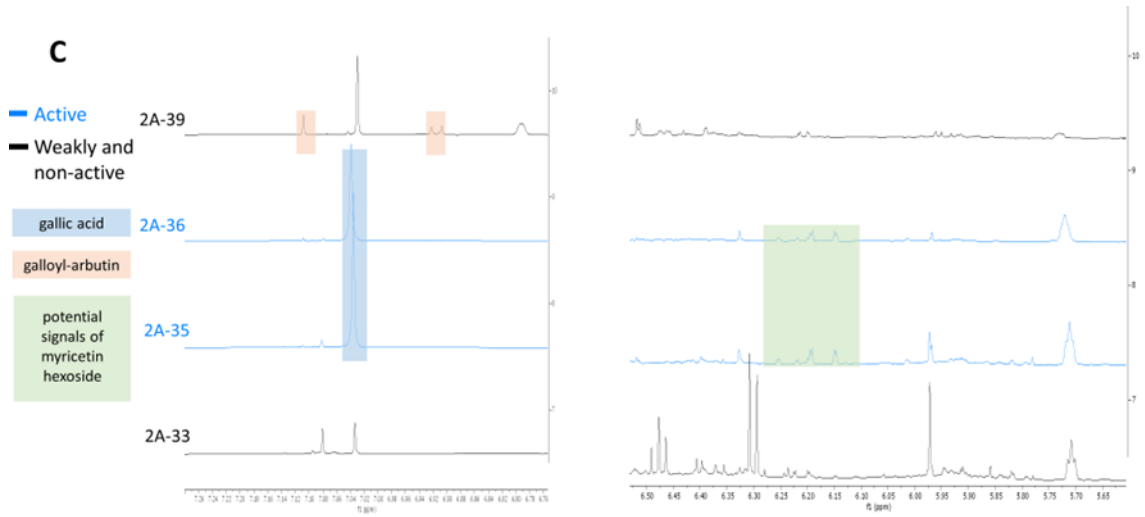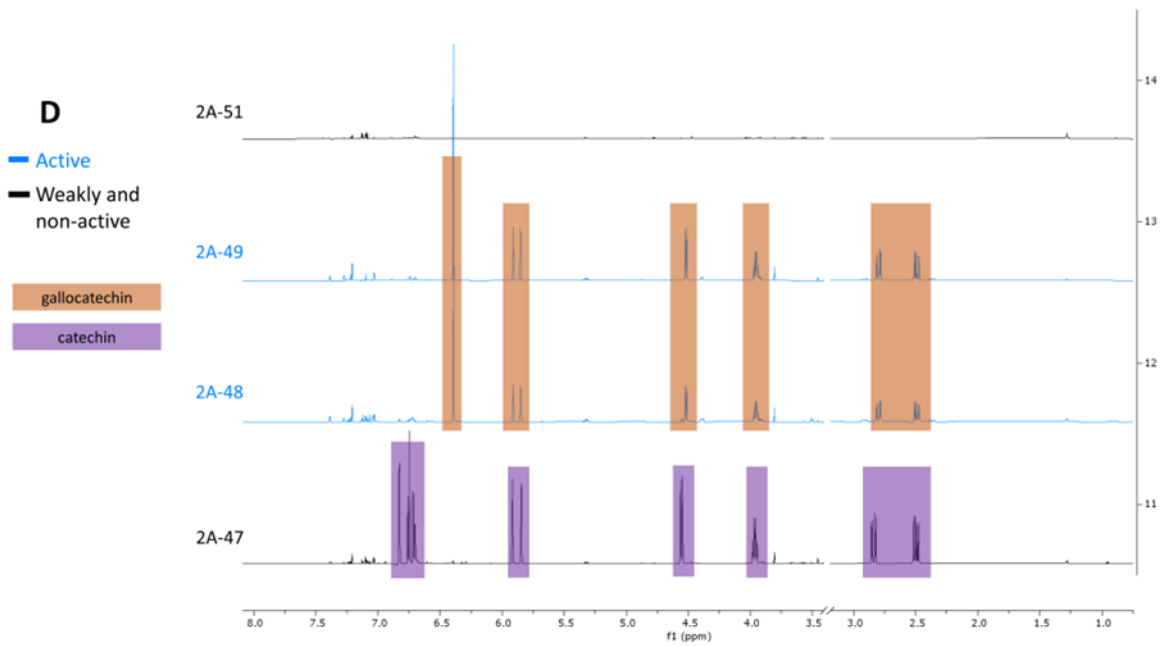

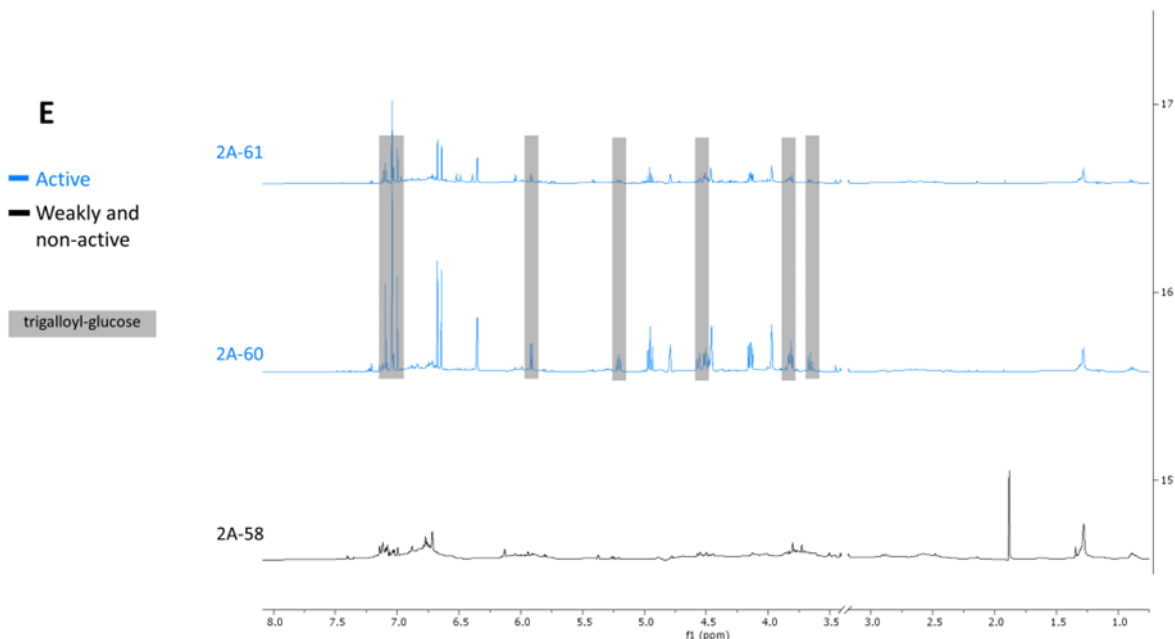

**Supplementary Figure S6. <sup>1</sup>H NMR full spectra of the analyzed FR2-A subfractions** (A) Summary of the active FRs (in blue) with respect to those adjacent weakly- or non-active (in black). The most relevant identified compounds are highlighted. (B) Spectra of 2A-29,2A-30,2A-31 with respect to adjacent 2A-27 and 2A-32. The active fractions exclusively contain fumaric acid (highlighted in red) and an unidentified pyrogallol-bearing compound (in yellow). (C) Spectra of 2A-35 and 2A-36 compared to adjacent 2A-33, 2A-39. The active fractions contain gallic acid (in blue) and myricetin hexoxide (in green), while the weakly active fraction 2A-39 contains galloyl-arbutin (in red). (D) Spectra of 2A-48 and 2A-49 compared to adjacent 2A-47 and 2A-51, the active fractions contain gallocatechin (in brown). In contrast, the non-active fraction 2A-47 contains catechin (in violet). (E) The spectra of 2A-60 and 2A-61 compared to 2A-58, the active fractions contain trigalloyl-glucose (in grey).

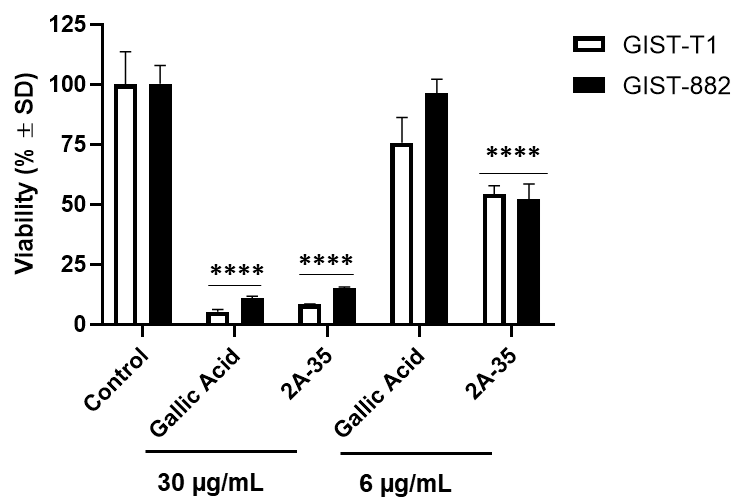

**Supplementary Figure S7. Gallic acid in GIST-882 and GIST-T1 cells.** Viability after gallic acid and 2A-35 treatments was measured by MTT assay. Both gallic acid and 2A-35 were used at 30 and 6 µg/mL. Viability is expressed in % ± SD with respect to control (DMSO). Viability was measured 24h after the MTT assay. Adjusted *P*-Value compared to DMSO: \*\*\*\* <0.0001 (one-way ANOVA and Dunnett's Multiple comparison test A representative experiment among three experimental replicates is shown).
